1 **Epidemiology of Syphilis infections among pregnant women in Tanzania:**  
2 **Analysis of the 2020 national representative sentinel surveillance.**

3 Bruno Sunguya<sup>1</sup>, Erick Mboya<sup>1\*</sup>, Mucho Mizinduko<sup>1</sup>, Belinda Balandya<sup>1</sup>, Amon Sabasaba<sup>1</sup>, Davis Elias  
4 Amani<sup>1</sup>, Doreen Kamori<sup>1</sup>, George Ruhago<sup>1</sup>, Rebecca Mkumbwa<sup>1</sup>, Prosper Faustine<sup>2</sup>, Werner Maokola<sup>2</sup>,  
5 Veryeh Sambu<sup>2</sup>, Jeremiah Mushi<sup>2</sup>, Mukome Nyamuhagata<sup>2</sup>, Boniphace S. Jullu<sup>3†</sup>, Amiri Juya<sup>4</sup>, Joan  
6 Rugemalila<sup>5</sup>, George Mgomella<sup>6</sup>, Sarah Asimwe<sup>7</sup>, Andrea B. Pembe<sup>1</sup>

7 \*Corresponding author

8 †Deceased

9

10 **Affiliation:**

11 <sup>1</sup> Muhimbili University of Health and Allied Sciences, Dar es salaam, Tanzania

12 <sup>2</sup> Ministry of Health, Dodoma, Tanzania

13 <sup>3</sup> St. Francis University College of Health and Allied Sciences, Morogoro, Tanzania

14 <sup>4</sup> Tanzania Field Epidemiology and Laboratory Training Program, Dar es salaam, Tanzania

15 <sup>5</sup> Muhimbili National Hospital, Dar es Salaam, Tanzania

16 <sup>6</sup> Centre for Diseases Control, Tanzania

17 <sup>7</sup> Global Fund, Tanzania Country Team

18

19

20

## 21 **Abstract**

22 **Background:** Syphilis has detrimental effects on the health of the mother and that of the child when pregnant.  
23 Understanding its local epidemiology is essential for policies, planning, and implementation of targeted  
24 preventive interventions. Using data from the 2020 National Sentinel Surveillance of pregnant women  
25 attending antenatal clinics (ANCs) in Tanzania we determined the prevalence and determinants of Syphilis  
26 among pregnant women in Tanzania mainland.

27 **Methodology:** The ANC surveillance was conducted in 159 ANC sites from all 26 regions of Tanzania's  
28 mainland from September to December 2020. It included all pregnant women older than 14 years on their  
29 first ANC visit in the current pregnancy during the survey period. Counselling for Syphilis was done using  
30 standard guidelines at the ANC and testing was done using rapid SD Bioline HIV/Syphilis Duo test kits.  
31 Analysis was done using both descriptive statistics to determine the prevalence and characteristics of syphilis,  
32 whereas, logistic regressions were used to examine the independent association between syphilis and  
33 dependent variables.

34 **Results:** A total of 38,783 women [median age (Interquartile range (IQR)) =25 (21-30) years] participated in  
35 the surveillance. Of them, 582 (1.4%) tested positive for Syphilis. A wide regional variation was observed  
36 with the highest burden in Kagera (4.5%) to the lowest burden in Kigoma (0.3%). The odds of Syphilis  
37 infections were higher among older women and those with no formal education. Compared with primigravids,  
38 women with 1-2, those with 3-4 and those with more than four previous pregnancies had 1.8 (aOR=1.8, 95%  
39 CI: 1.2-2.5), 2.1 (aOR=2.1, 95% CI: 1.4-3.1) and 2.6 (aOR=2.6, 95% CI: 1.7-3.9) higher odds of syphilis  
40 infection respectively.

41 **Conclusion:** Syphilis is still prevalent among pregnant women in Tanzania with a wide regional disparity.  
42 Efforts to prevent new infections, screen pregnant women, and treat those infected should be strategized to  
43 include all regions and renewed emphasis in regions with high burden, and importantly among women who  
44 are multipara, with the low level of education, and advanced age.

45 **Keywords:** *Syphilis, Pregnancy, Antenatal care, Tanzania*

46

47

## 48 **Introduction**

49 Caused by *Treponema pallidum*, Syphilis has remained a detrimental sexually transmitted disease, more  
50 prevalent in low-and middle-income countries (LMICs), and can be transmitted from mother to child (Cohn  
51 *et al.*, 2021; WHO, 2021). About 900,000 pregnant women were infected with Syphilis and over 660,000  
52 cases of congenital syphilis in 2016 were noted in 2016 alone (Korenromp *et al.*, 2019). The WHO African  
53 region has the highest prevalence of Syphilis (1.5%) among pregnant women compared to other regions in  
54 the world (Cohn *et al.*, 2021). Within the continent, the East African region has been reported to be the region  
55 with the highest prevalence of syphilis in pregnancy (Hussen and Tadesse, 2019). Efforts to address the burden  
56 of syphilis has resulted into a steady decline of its prevalence in Tanzania, especially among pregnant women  
57 from 8.3% in 2000 to 2% in 2011 (Swai *et al.*, 2006; Manyahi *et al.*, 2015, 2017).

58 Syphilis has detrimental effects on the health of the mother and that of the child when pregnant. In 2019, over  
59 half of Syphilis cases in pregnancy suffered adverse birth outcomes including early fetal deaths, stillbirths,  
60 neonatal deaths, pre-term birth or low birth weights, and clinical congenital syphilis (Korenromp *et al.*, 2019).  
61 Additionally, HIV and Syphilis infections interact and co-infection during pregnancy increases the risk of  
62 vertical transmission of HIV coupled with adverse outcomes of pregnancy (Mwapasa *et al.*, 2006; Shava,  
63 Moyo and Zash, 2019).

64 Owing to the unprecedented effect of the disease, especially during pregnancy and therefore birth outcomes,  
65 prevention efforts are of utmost importance. These efforts should be coupled with those of prevention of  
66 Mother to Child Transmission of HIV and that of other STIs. The effects of such efforts need to be verified  
67 through quality data to inform the national response, determining areas and regions with remaining challenge,  
68 populations more at risk, and characteristics of the burden in the country. The last of such survey is one decade  
69 old. There is therefore a gap for comprehensive and updated information about Syphilis infections in  
70 pregnancy at the national and subnational levels in Tanzania thus rendering difficulty ascertaining the burden  
71 accurately.

72 For programs and stakeholders to efficiently plan, and implement interventions to reduce morbidity and  
73 mortality from these infections, they need accurate information about the distribution of the infections at the  
74 national and sub-national levels. Such interventions include prevention of new cases, ensuring availability  
75 and accessibility of testing services, initiation and retention to treatment, safe delivery and post-natal

76 prophylaxis as well as early diagnosis of congenital syphilis (Cock *et al.*, 2015; Hurst, 2015; Drake *et al.*,  
77 2019; WHO, 2021). Recognizing the need for updated and comprehensive information on syphilis infections  
78 among pregnant women in Tanzania, and using the data from the 2020 antenatal HIV and Syphilis sentinel  
79 surveillance in Tanzania mainland, we determined the prevalence of syphilis and the factors associated with  
80 the infection among pregnant women in Tanzania mainland.

81

## 82 **Methodology**

### 83 **Surveillance duration and site selection**

84 Data for the Antenatal Clinic (ANC) HIV & Syphilis Sentinel Surveillance (HSS) was collected from  
85 September to December 2020 in all 26 regions of Tanzania mainland. A total of 159 antenatal clinics (ANCs)  
86 providing Prevention of Mother to Child Transmission (PMTCT) services were included in this surveillance.  
87 In Tanzania, ANC coverage of at least one visit is more than 98%, and Syphilis testing services are integrated  
88 into ANCs (WHO, 2022). All pregnant women are counselled, and routinely offered Syphilis test using a  
89 national guideline and as a standard of care. Those who test positive are immediately initiated on treatment in  
90 line with the national guidelines (MoH, 2013). In addition, women who opt out at their first ANC visit are  
91 informed that they can access Syphilis testing at any future visit if they change their minds (MoH, 2013). As  
92 for the previous HSS rounds, two urban, two semi-urban, and two rural sites were selected from each region,  
93 except for the Dar es Salaam region, where all six sites are classified as urban.

### 94 **Survey population**

95 All pregnant women aged 15 years and above attending ANC on their first visit in the current pregnancy  
96 during the survey period were eligible for inclusion in the ANC HSS. However, only those who provided  
97 written consent and were willing to give a blood sample for routine Prevention of Mother To Child  
98 Transmission (PMTCT) of HIV and Syphilis testing were included in the surveillance. All sites enrolled ANC  
99 attendees who were making their debut visits. To achieve the targeted sample size, all sites carried out data  
100 collection continuously for three consecutive months.

### 101 **Training of research personnel**

102 A group of national-level facilitators was trained on implementing the ANC HSS by the principal investigator  
103 and the co-investigators. These national-level facilitators then conducted zonal training workshops organized  
104 in five zones before the commencement of the survey. Participants included nurses attending ANC clients  
105 from all 159 sites and regional and district personnel involved in the survey implementation. The training  
106 content included a review of operational procedures and field protocols for ANC HSS based on routine data,  
107 including training on the updated ANC HSS data collection form and HIV and Syphilis testing practical. In  
108 addition, a team of national-level study staff was trained to monitor the quality of routinely collected PMTCT  
109 data and the quality of PMTCT HIV and Syphilis testing.

## 110 **Data collection**

111 This surveillance was integrated into routine ANC activities where all women attending the ANC on a  
112 particular day were informed of the ongoing surveillance. The provider explained the study and its procedures,  
113 and later obtained written informed consent from the participant for each component of the survey (the  
114 interview, and routine rapid testing for HIV and Syphilis). In addition, a non-identifying unique survey ID  
115 code (HSS number) pre-printed on barcode stickers was assigned to each prospective survey participant found  
116 to be eligible.

117 The questionnaire used, was developed in English, translated into Swahili, and then translated back into  
118 English by a third party to verify the accuracy of the translation. It was administered by a trained RCH provider  
119 using an electronic tablet loaded with open data kit (ODK), a data collection software. It captured the HSS  
120 number, ANC number, age, marital status, gravidity, education level, residence, employment, and Syphilis  
121 results. Electronic data were uploaded to a password-protected server at the end of each day.

## 122 **Blood testing procedures**

123 Following the interview, blood sample was drawn from all consented participants. Syphilis testing was  
124 conducted according to the national guidelines and the national rapid testing algorithm (NACP, 2019). Since  
125 the HSS was conducted for both HIV and Syphilis, the provider conducted HIV and Syphilis testing using  
126 rapid SD Bioline HIV/ Syphilis Duo test kits. The Ministry of Health (MOH) adopted the kit owing to its cost-  
127 effectiveness in testing for both HIV and Syphilis and enables broader Syphilis testing coverage (Lyamuya *et*  
128 *al.*, 2009; Olugbenga *et al.*, 2018). Each participant received their result in a post-test counselling session

129 participants with positive Syphilis test results were treated according to National STI Management Guidelines.  
130 Syphilis test result data were recorded on a register and entered into an ODK form.

### 131 **Data management and analysis**

132 Sociodemographic data and routine blood testing data collected were uploaded daily to a password-protected  
133 cloud storage system by each survey team member to allow for real-time data monitoring. To minimize data  
134 entry errors, questions in the ODK had prompts and checks for data validation and correction of identified  
135 errors.

136 Analysis was conducted using Stata Statistical software ver. 17 (College Station, TX: Stata Corp LLC.). The  
137 prevalence of pregnant women infected with Syphilis was calculated at the national and regional levels,  
138 disaggregated by demographic characteristics. The prevalence and the logistic regression estimates explained  
139 below considered the survey design of this surveillance (clustering at the health facility level and stratification  
140 by locality that is rural, semi-urban, and urban). The estimates were also weighed using inverse probability  
141 weights based on the total number of women who attended ANC during the study period at each region.  
142 Logistic regressions were used to examine the independent association between dependent variables, Syphilis  
143 infection, with independent variables such as age, marital status, parity, education level, source of income,  
144 and locality. Known confounders such as age and other factors with associations reaching p-value <0.2 at the  
145 univariate analysis were included in the multivariate model. The level of statistical significance was set at  
146  $p < 0.05$ .

### 147 **Ethical consideration**

148 Study staff sought informed consent from potential participants before they engaged them in the survey.  
149 Pregnant women who did not consent to participate in the survey received routine ANC care as supposed.  
150 Participants were assured that their responses would be kept confidential and that no harm would come to  
151 them because of agreeing or not agreeing to participate in the survey. Approval to conduct this study was  
152 provided by the MUHAS Institutional Review Board (MUHAS-REC-07-2020-298). Strict protection ensured  
153 data security and confidentiality. The ANC HSS did not collect any personally identifiable information other  
154 than what was essential to meet the assessment objectives.

155

## 156 **Results**

### 157 **Demographic characteristics**

158 The 2020 survey included 39,516 pregnant women. Of them, 38,783 (98.1%), consented to participate in the  
159 surveillance and tested for Syphilis. Demographic characteristics were as follows: Their median age (inter  
160 quartile range (IQR)) was 25 (21-30) years, and 45.8% of them were between 15-24 years. About 78.5% were  
161 married, 60.9% had attained primary school education, 48.9% were housewives, and 44.6% had at most two  
162 previous pregnancies. One in four (26.3%) was a primigravida. Almost half of the participants, 48.6% were  
163 recruited from facilities located in urban areas. **Table 1.**

### 164 **Prevalence of Syphilis among pregnant women**

165 The overall prevalence of Syphilis infection in Tanzania among pregnant women attending ANC was 1.4%  
166 (1.2% - 1.8%). The crude prevalence of Syphilis 1.5% (0.5%- 3.8%).

167 The prevalence of Syphilis was the highest was among pregnant women aged 35-44 years (3.5%) and lowest  
168 (0.7%) among the youngest, 15-24 years. The burden decreased with increase in the level of education. For  
169 this, the highest burden was among pregnant women with no formal education (2.9%), while those with post-  
170 secondary education had the lowest burden (0.4%). The prevalence also increased with parity. For example,  
171 while the burden was the lowest among pregnant women in their first pregnancy (0.5%), it was the highest  
172 among those with at least five previous pregnancies (3.9%). The prevalence of syphilis was higher among  
173 women in rural areas (2.3%), compared to semi-urban (1.6%) and urban areas (1.0%). **Table 1.**

174

175 **Table 1: Demographic characteristics of participants and prevalence of Syphilis among pregnant**  
 176 **women in Tanzania**

| <b>Variable</b>                             | <b>Total</b>  | <b>Syphilis Infection</b>      |
|---------------------------------------------|---------------|--------------------------------|
| <b>Age group (years)</b>                    | <b>N (%)</b>  | <b>Prevalence (%) (95% CI)</b> |
| Median age (IQR) in years                   | 25 (21- 30)   |                                |
| 15-24                                       | 17766 (45.8)  | 0.7 (0.6-1.0)                  |
| 25-34                                       | 15917 (41.0)  | 1.6 (1.3-2.1)                  |
| 35-44                                       | 4746 (12.2)   | 3.5 (2.7-4.3)                  |
| 45+                                         | 354 (0.9)     | 2.7 (1.1-6.7)                  |
| <b>Education level</b>                      |               |                                |
| None                                        | 4,896 (12.6)  | 2.9 (2.2-3.8)                  |
| Primary                                     | 23,627 (60.9) | 1.5 (1.3-1.9)                  |
| Secondary                                   | 9,035 (23.3)  | 0.6 (0.4-0.9)                  |
| Post-secondary                              | 1,225 (3.2)   | 0.4 (0.1-1.4)                  |
| <b>Marital status</b>                       |               |                                |
| Co-habiting                                 | 5,081 (13.1)  | 1.1 (0.8-1.5)                  |
| Divorced/separated                          | 308 (0.8)     | 2.1 (0.8-5.4)                  |
| Married                                     | 30,446 (78.5) | 1.6 (1.3-1.9)                  |
| Single                                      | 2,835 (7.3)   | 0.8 (0.5-1.3)                  |
| Widowed                                     | 113 (0.3)     | 2.7 (1.0-7.4)                  |
| <b>Employment status</b>                    |               |                                |
| Employed                                    | 2,014 (5.2)   | 0.8 (0.5-1.3)                  |
| Housewife                                   | 18,956 (48.9) | 1.4 (1.2-1.7)                  |
| Self employed                               | 15,032 (38.8) | 1.6 (1.2-2.2)                  |
| Unemployed                                  | 2,781 (7.2)   | 1.1 (0.6-1.8)                  |
| <b>Total number of previous pregnancies</b> |               |                                |
| 0                                           | 10,199 (26.3) | 0.5 (0.3-0.7)                  |
| 1-2                                         | 17,285 (44.6) | 1.2 (0.9-1.6)                  |
| 3-4                                         | 7,916 (20.4)  | 2.2 (1.7-2.8)                  |
| >4                                          | 3,383 (8.7)   | 3.9 (3.2-4.9)                  |



| <b>Locality</b>              |               |               |
|------------------------------|---------------|---------------|
| Rural                        | 6,925 (17.9)  | 2.3 (1.7-3.2) |
| Semi-urban                   | 13,020 (33.6) | 1.6 (1.3-2.0) |
| Urban                        | 18,838 (48.6) | 1.0 (0.7-1.4) |
| <b>Health facility level</b> |               |               |
| Dispensary                   | 6,131 (15.8)  | 1.7 (1.1-2.7) |
| Health Centre                | 23,837 (61.5) | 1.4 (1.1-1.8) |
| Hospital                     | 8,815 (8815)  | 1.4 (1.0-1.9) |

177

178 The burden varied between regions. The highest burden was in Kagera (4.5%), followed by Mbeya (3.4%),  
 179 and Geita (2.7%), while the lowest prevalence was recorded in Kigoma region (0.3%). **Table 2.**

180

181 **Table 2: Prevalence of HIV, Syphilis, and HIV& Syphilis co-infection by regions**

| <b>Region</b> | <b>Total</b> | <b>Syphilis Infection</b> |                                |
|---------------|--------------|---------------------------|--------------------------------|
|               | <b>N</b>     | <b>n</b>                  | <b>Prevalence (%) (95% CI)</b> |
| Arusha        | 1,542        | 11                        | 0.7 (0.4-1.3)                  |
| Dar es Salaam | 2,874        | 19                        | 0.7 (0.3-1.7)                  |
| Dodoma        | 1,749        | 11                        | 0.6 (0.2-1.8)                  |
| Geita         | 3,460        | 93                        | 2.7 (1.7-4.1)                  |
| Iringa        | 882          | 17                        | 1.9 (1.2-3.1)                  |
| Kagera        | 1,481        | 67                        | 4.5 (3-6.8)                    |
| Katavi        | 1,224        | 20                        | 1.6 (0.6-4.3)                  |
| Kigoma        | 1,372        | 4                         | 0.3 (0.1-0.8)                  |
| Kilimanjaro   | 968          | 4                         | 0.4 (0.2-0.8)                  |
| Lindi         | 508          | 7                         | 1.4 (0.7-2.9)                  |
| Manyara       | 924          | 10                        | 1.1 (0.6-2.1)                  |
| Mara          | 1,509        | 26                        | 1.7 (1.4-2.1)                  |
| Mbeya         | 2,032        | 68                        | 3.3 (2.3-4.8)                  |

---

|              |               |            |                        |
|--------------|---------------|------------|------------------------|
| Morogoro     | 728           | 5          | 0.7 (0.2-2.2)          |
| Mtwara       | 814           | 15         | 1.8 (0.9-3.6)          |
| Mwanza       | 2,232         | 33         | 1.5 (0.5-4.1)          |
| Njombe       | 670           | 17         | 2.5 (1.4-4.5)          |
| Pwani        | 1,841         | 8          | 0.4 (0.1-1.3)          |
| Rukwa        | 1,265         | 25         | 2 (1.4-2.7)            |
| Ruvuma       | 1,119         | 12         | 1.1 (0.3-4.1)          |
| Shinyanga    | 1,477         | 29         | 2 (1.3-3)              |
| Simiyu       | 1,956         | 24         | 1.2 (0.5-2.7)          |
| Singida      | 1,549         | 14         | 0.9 (0.2-3.6)          |
| Songwe       | 1,902         | 18         | 0.9 (0.4-2.3)          |
| Tabora       | 1,408         | 20         | 1.4 (0.8-2.5)          |
| Tanga        | 1,297         | 5          | 0.4 (0.1-1.5)          |
| <b>Total</b> | <b>38,783</b> | <b>582</b> | <b>1.4 (1.2 - 1.8)</b> |

---

182

### 183 **Determinants of Syphilis infection**

184 In a multiple logistic regression, age, education level, and the number of previous pregnancies were  
185 independent predictors of Syphilis infection among pregnant women in Tanzania mainland. Compared to  
186 younger women aged 15-24 years, women aged 25-34 years were 1.7 times more likely to test positive for  
187 syphilis infection (aOR=1.7, 95% CI:1.3-2.3), while those aged 35-44 years had about 2.8 times the odds of  
188 syphilis infection (aOR=2.8, 95%CI: 1.9- 4.0) –**Table 3**.

189 Compared to women with post-secondary education, women with no formal education had about five times  
190 higher odds of Syphilis infection (aOR=5.1, 95% CI: 1.3-20.2).

191 Further, analyses showed that, the risk of syphilis infection increased with increasing number of pregnancies.  
192 Compared with primigravids, women with 1-2 and those with 3-4 previous pregnancies had 1.8 and 2.1 higher  
193 odds of syphilis infection, (aOR=1.8, 95% CI: 1.2-2.5), and (aOR=2.1, 95% CI: 1.4-3.1). And those with more  
194 than four previous pregnancies had 2.6 times higher odds of syphilis infection compared to primigravids  
195 (aOR=2.6, 95% CI: 1.7-3.9).

196 Pregnant women in urban areas had 40% lower odds of Syphilis infection compared to those in rural areas  
 197 (aOR=0.6, 95% CI: 0.3-1.0) –Table 3.

198 **Table 3: Factors associated with Syphilis infection**

| Variable                              | cOR (95% CI)   | aOR (95% CI)   | p-value |
|---------------------------------------|----------------|----------------|---------|
| <b>Age group (years)</b>              |                |                |         |
| 15-25                                 | Ref            |                |         |
| 25-34                                 | 2.2 (1.7-2.9)  | 1.7 (1.3-2.3)  | 0.001   |
| 35-44                                 | 4.9 (3.6-6.6)  | 2.8 (1.9-4.0)  | <0.001  |
| 45+                                   | 3.8 (1.5-9.8)  | 2.4 (1.0-5.7)  | 0.042   |
| <b>Education level</b>                |                |                |         |
| None                                  | 7.8 (2.1-28.6) | 5.1 (1.3-20.2) | 0.020   |
| Primary                               | 4.1 (1.1-15.0) | 3.2 (0.8-12.5) | 0.100   |
| Secondary                             | 1.5 (0.4-4.8)  | 1.4 (0.4-5.0)  | 0.563   |
| Post-secondary                        | Ref            |                |         |
| <b>Marital status</b>                 |                |                |         |
| Co-habiting                           | 0.7 (0.5-1.0)  | 0.9 (0.6-1.2)  | 0.410   |
| Divorced/separated                    | 1.3 (0.5-3.5)  | 1.2 (0.4-3.2)  | 0.786   |
| Married                               | Ref            |                |         |
| Single                                | 0.5 (0.3-0.8)  | 0.9 (0.6-1.4)  | 0.696   |
| Widowed                               | 1.7 (0.6-5.1)  | 1.2 (0.4-3.7)  | 0.726   |
| <b>Occupation</b>                     |                |                |         |
| Employed                              | 0.8 (0.4-1.6)  | 1.3 (0.6-2.6)  | 0.474   |
| Housewife                             | 1.3 (0.8-2.3)  | 1.2 (0.7-2.0)  | 0.600   |
| Self employed                         | 1.5 (0.8-2.9)  | 1.5 (0.8- 2.8) | 0.171   |
| Unemployed                            | Ref            |                |         |
| <b>Number of previous pregnancies</b> |                |                |         |
| 0                                     | Ref            |                |         |
| 1-2                                   | 2.5 (1.8-3.5)  | 1.8 (1.2-2.5)  | 0.001   |
| 3-4                                   | 4.7 (3.3-6.6)  | 2.1 (1.4-3.1)  | 0.001   |
| >4                                    | 8.5 (6.0-12.0) | 2.6 (1.7-3.9)  | <0.001  |

---

| <b>Locality</b>              |                |               |       |
|------------------------------|----------------|---------------|-------|
| Rural                        | Ref            |               |       |
| Semi-urban                   | 0.7 (0.5-1.0)  | 0.8 (0.5-1.3) | 0.391 |
| Urban                        | 0.4 (0.2-0.7)  | 0.6 (0.3-1.0) | 0.050 |
| <b>Health facility level</b> |                |               |       |
| Dispensary                   | Ref            |               |       |
| Health Centre                | 0.8 (0.5-1.4)  |               |       |
| Hospital                     | 0.8 (0.5- 1.4) |               |       |

---

199

## 200 **Discussion**

201 The results of the 2020 HIV-Syphilis sentinel surveillance among pregnant women attending ANC in  
202 Tanzania mainland reveal the prevalence of Syphilis of 1.4% (1.2% - 1.8%). This is equivalent to 30,800  
203 (26,400- 39,600) pregnant women attending ANC in a year. There was also marked variability of the  
204 prevalence ranging from 0.3% in Kigoma to 4.5% in Kagera regions. Our results also indicate that higher  
205 Syphilis infection among pregnant women are associated with older age, no education, and increasing number  
206 of pregnancies.

207 Syphilis being prevalent among 1.4% pregnant women in Tanzania is worrisome, owing to the unprecedented  
208 impact the disease can have to the women and birth outcomes. The national prevalence of syphilis in this  
209 survey is in-line with the decreasing trend of Syphilis among pregnant women as the national prevalence of  
210 Syphilis for pregnant women has continued to decline from 4.3% in 2008, to 2.5% in 2011, and to 1.8% in  
211 2017 (Swai *et al.*, 2006; Manyahi *et al.*, 2015). Further, compared to the estimated prevalence of Syphilis  
212 among pregnant women in the East African region, 3.2%, and that of the African region 2.5%, the prevalence  
213 is lower in Tanzania (Hussen and Tadesse, 2019). Tanzania has maintained the downward trend of the  
214 prevalence for pregnant women over the years. However, the prevalence is still much higher than the global  
215 average of Syphilis among pregnant women, 0.6% (Korenromp *et al.*, 2019). To successfully eliminate  
216 Syphilis concerted efforts are still needed to address syphilis infection among pregnant women.

217 In this study, the prevalence of syphilis was higher among older pregnant women than younger pregnant  
218 women and also lowest among primigravids women and increased with the number of pregnancies. Untreated  
219 Syphilis can evolve from primary stage and secondary stages to latent stage where the symptomatology of the  
220 secondary stage resolves. As these women will still have a positive serologic test but lack clinical  
221 manifestation, it is possible that the increased prevalence in older women than younger ones and among  
222 multipara women than primigravids indicate that many pregnant women in Tanzania remain untreated and  
223 have a latent Syphilis or are re-infected as their partners remain untreated (Tsimis and Sheffield, 2017). And  
224 although at this stage patients are not considered infectious through sexual transmission, vertical transmissions  
225 have been reported (Tsimis and Sheffield, 2017). Treatment for Syphilis is available in the country, therefore  
226 efforts to screen pregnant women and their partners should be emphasized and linking both to care if positive.  
227 The consequences of untreated syphilis to the unborn baby include stillbirth, and congenital syphilis among  
228 others (Gomez *et al.*, 2013; Shava, Moyo and Zash, 2019). Syphilis also facilitate the vertical transmission of  
229 HIV, an existent concern in settings with high HIV burden such as Tanzania (Mwapasa *et al.*, 2006).

230 In this study, education level was associated with Syphilis infection among pregnant women where women  
231 who had no education had significantly higher prevalence of Syphilis than women with higher education  
232 levels. While education was significantly associated with syphilis in the 2003/2004 surveillance of pregnant  
233 women in Tanzania, it was not in the 2011 surveillance (Swai *et al.*, 2006; Manyahi *et al.*, 2015). This may  
234 be due to the scaling up of the Syphilis screening and testing since the WHO declaration to eliminate Syphilis  
235 in 2008 (WHO, 2021). The association of Syphilis and education has also been reported among women and  
236 men in the general population in Kenya (Otieno-Nyunya *et al.*, 2011). Having education renders one less  
237 likely to engage in risky sexual behaviors, but enables access and uptake to care and treatment (Leon *et al.*,  
238 2017). There was also borderline evidence of higher Syphilis infection in rural areas compared to urban areas.

239 The interpretation of these results is not without a potential limitation. Although the survey spanned across  
240 all the 26 regions of Tanzania mainland, the generalizability of the findings should be with caution. Most of  
241 the sites used in this survey were inherited from previous surveys and there have been many newer PMTCT  
242 sites which could have featured in the sampling frame had the sampling conducted again. Thus, the choice to  
243 inherit previous PMTCT sites might have narrowed our potency to be as representative as possible. Moreover,  
244 this is a cross sectional study whose findings may not ascertain causality. However, the survey offer a  
245 comparison with previous surveys, and trends can be established. With such high sample size, the study

246 provides a more reliable estimate of national prevalence, with sub-national estimates adequate for  
247 interventional planning and execution.

## 248 **Conclusion**

249 Syphilis remains prevalent among pregnant women in Tanzania with wide regional burden disparity. Efforts  
250 to prevent new infections, screen pregnant women, and treat those infected should be strategized to include  
251 all regions and renewed emphasis in regions with high burden, and importantly among women who are  
252 multipara, with the low level of education, and advanced age.

## 253 **Acknowledgment**

254 We wish to thank all regional and district medical officers, regional and district reproductive, and sexual  
255 health coordinators for their support in the implementation of the survey. Our sincere appreciations to the  
256 nurses at the facilities for their commitment throughout the study.

## 257 **Reference**

258 Cock, K.M. De *et al.* (2015) ‘Prevention of Mother-to-Child HIV Transmission in Resource-Poor  
259 Countries’, *JAMA*, 283(9).

260 Cohn, J. *et al.* (2021) ‘Eliminating mother-to-child transmission of human immunodeficiency virus, syphilis  
261 and hepatitis b in sub-saharan africa’, *Bulletin of the World Health Organization*, 99(4), pp. 287–295.  
262 doi:10.2471/BLT.20.272559.

263 Drake, A.L. *et al.* (2019) ‘Retest and treat : a review of national HIV retesting guidelines to inform  
264 elimination of mother-to-child HIV transmission ( EMTCT ) efforts’. doi:10.1002/jia2.25271.

265 Gomez, G.B. *et al.* (2013) ‘Untreated maternal syphilis and adverse outcomes of pregnancy : a systematic  
266 review and meta-analysis’, *Systematic Reviews*, 91(January), pp. 217–226. doi:10.2471/BLT.12.107623.

267 Hurst, S.A. (2015) ‘Prevention of mother-to-child transmission of HIV Type 1 : the role of neonatal and  
268 infant prophylaxis’, pp. 169–181.

- 269 Hussen, S. and Tadesse, B.T. (2019) ‘Prevalence of Syphilis among Pregnant Women in Sub-Saharan  
270 Africa : A Systematic Review and Meta-Analysis’, *BioMed Research International*, 2019, p. 10.
- 271 Korenromp, E.L. *et al.* (2019) ‘Global burden of maternal and congenital syphilis and associated adverse  
272 birth outcomes — Estimates for 2016 and progress since 2012’, *PLoS ONE*, 14(2), pp. 1–17.
- 273 Leon, J. *et al.* (2017) ‘Is education a risk factor or social vaccine against HIV / AIDS in Sub-Saharan  
274 Africa ? The effect of schooling across public health periods’, *Journal of Population Research* [Preprint].  
275 doi:10.1007/s12546-017-9192-5.
- 276 Lyamuya, E.F. *et al.* (2009) ‘Evaluation of simple rapid HIV assays and development of national rapid HIV  
277 test algorithms in Dar es Salaam, Tanzania’, *BMC Infectious Diseases*, 9, pp. 1–7. doi:10.1186/1471-2334-  
278 9-19.
- 279 Manyahi, J. *et al.* (2015) ‘Prevalence of HIV and syphilis infections among pregnant women attending  
280 antenatal clinics in Tanzania, 2011 Disease epidemiology - Infectious’, *BMC Public Health*, 15(1), pp. 1–9.  
281 doi:10.1186/s12889-015-1848-5.
- 282 Manyahi, J. *et al.* (2017) ‘Decline in the prevalence HIV among pregnant women attending antenatal clinics  
283 in Tanzania , 2001-2011’, *Tanzania Journal of Health Research*, 19(2), pp. 1–8.
- 284 MoH (2013) *National Guidelines for Comprehensive Care Services for Prevention of Mother-to-Child  
285 Transmission of HIV and Keeping Mothers Alive*. Dar Es Salaam: Ministry of Health, Community  
286 Development, Gender, Elderly and Children TANZANIA NCD PREVENTION AND CONTROL  
287 PROGRAM.
- 288 Mwapasa, V. *et al.* (2006) ‘Maternal syphilis infection is associated with increased risk of mother-to-child  
289 transmission of HIV in Malawi’, *AIDS*, 20(14), pp. 1869–1878.
- 290 NACP (2019) *NATIONAL GUIDELINES FOR THE MANAGEMENT OF HIV AND AIDS*. 7th Editio.  
291 Dodoma: Ministry of Health, Community Development, Gender, Elderly and Children TANZANIA NCD  
292 PREVENTION AND CONTROL PROGRAM.
- 293 Olugbenga, I. *et al.* (2018) ‘Clinic-based evaluation study of the diagnostic accuracy of a dual rapid test for  
294 the screening of HIV and syphilis in pregnant women in Nigeria’, *PLoS ONE*, 13(7), pp. 1–16.

295 doi:10.1371/journal.pone.0198698.

296 Otieno-Nyunya, B. *et al.* (2011) ‘Epidemiology of syphilis in Kenya: Results from a nationally  
297 representative serological survey’, *Sexually Transmitted Infections*, 87(6), pp. 521–525.

298 doi:10.1136/sextrans-2011-050026.

299 Shava, E., Moyo, S. and Zash, R. (2019) ‘High Rates of Adverse Birth Outcomes in HIV and Syphilis  
300 Coinfected Women in Botswana’, 81(5), pp. 135–140.

301 Swai, R.O. *et al.* (2006) ‘Surveillance of HIV and syphilis infections among antenatal clinic attendees in  
302 Tanzania-2003/2004’, *BMC Public Health*, 6, pp. 1–10. doi:10.1186/1471-2458-6-91.

303 Tsimis, M.E. and Sheffield, J.S. (2017) ‘Update on Syphilis and Pregnancy’, *Birth Defects Research*, 109,  
304 pp. 347–352. doi:10.1002/bdra.23562.

305 WHO (2021) *Global guidance on criteria and processes for validation: elimination of mother-to-child  
306 transmission of HIV, Syphilis and Hepatitis B virus*. Geneva.

307 WHO (2022) *HIV Country Profile United Republic Of Tanzania, WHO HTS Dashboard*. Available at:  
308 <https://cfs.hivci.org/index.html> (Accessed: 13 October 2022).
